# Supplementary material
Source: publisher site journal article supplement (https://www.dovepress.com/article/407837)

Supplementary figure 1. Comparison of overall and progression-free survival based on cell-of origin

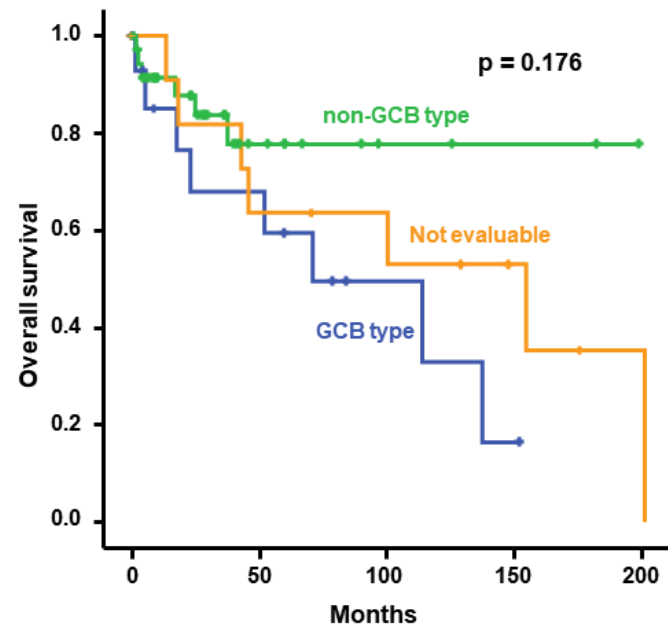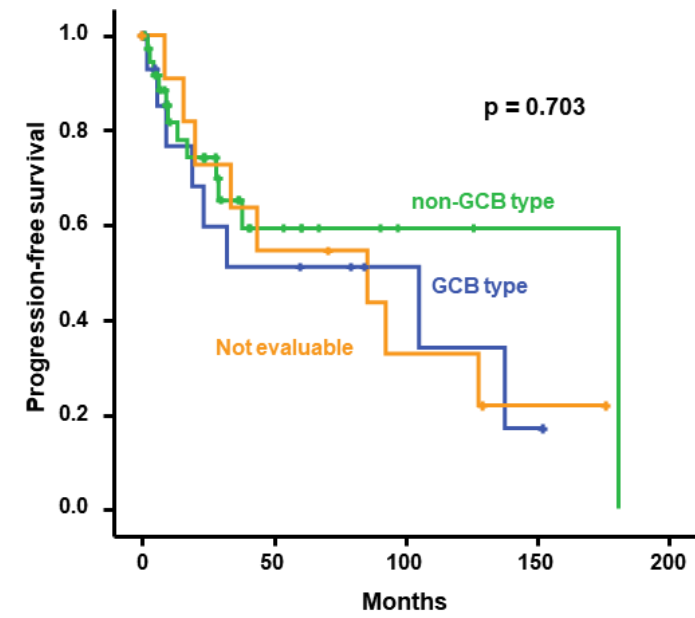

Supplement: Supplementary file 1 [file get_supplementary_file.php]
